# Supplementary material for: Redox active ligand and metal cooperation for C(sp2)–H oxidation: extension of the galactose oxidase mechanism in water-mediated amide formation
Source: Royal Society of Chemistry journal article supplement (doi:10.1039/c8dt03477j), 2018-01-01
Supplement: c8dt03477j1.pdf [file c8dt03477j1.pdf]

## Supporting Information

### Redox Active Ligand and Metal Cooperation for C(sp<sup>2</sup>)-H Oxidation: Extension of Galactose Oxidase Mechanism in Water-Mediated Amide Formation

Zahra Alaji,<sup>a</sup> Elham Safaei\*,<sup>a, b</sup> Hong Yi,<sup>c</sup> Hengjiang Cong,<sup>c</sup> Andrzej Wojtczak,<sup>d</sup>  
Aiwen Lei\*,<sup>c</sup>

<sup>a</sup>*Institute for Advanced Studies in Basic Sciences (IASBS), 45137-66731, Zanjan, Iran.*

<sup>b</sup>*Department of Chemistry, College of Sciences, Shiraz University, 71454, Shiraz, Iran.*  
Email: [e.safaei@shirazu.ac.ir](mailto:e.safaei@shirazu.ac.ir)

<sup>c</sup>*College of Chemistry and Molecular Sciences, Institute for Advanced Studies (IAS), Wuhan University, Wuhan, Hubei 430072, P. R. China.*  
Email: [aiwenlei@whu.edu.cn](mailto:aiwenlei@whu.edu.cn)

<sup>d</sup>*Nicolaus Copernicus University, Faculty of Chemistry, 87-100 Torun, Poland*

## Content

|                                                                                                                                                                                                                                                                        |            |
|------------------------------------------------------------------------------------------------------------------------------------------------------------------------------------------------------------------------------------------------------------------------|------------|
| <b>Materials and Physical Methods</b>                                                                                                                                                                                                                                  | <b>S3</b>  |
| <b>Material Synthesis</b>                                                                                                                                                                                                                                              | <b>S3</b>  |
| <b>Figure S1.</b> LC-MS spectrum of HL <sup>IPIP</sup>                                                                                                                                                                                                                 | <b>S4</b>  |
| <b>Figure S2.</b> ESI-MS(HRMS) spectrum of CuL <sup>IPIP</sup>                                                                                                                                                                                                         | <b>S6</b>  |
| <b>Figure S3.</b> Molecular structure of Cu <sup>II</sup> L <sup>IPIP</sup>                                                                                                                                                                                            | <b>S6</b>  |
| <b>Figure S4.</b> Isotope experiment of the reactions aminophenol-iminopyridine ligand and Cu(OAc) <sub>2</sub> in the presence of H <sub>2</sub> <sup>18</sup> O                                                                                                      | <b>S7</b>  |
| <b>Figure S5.</b> <sup>1</sup> H NMR of NiL <sup>APIP-OH</sup>                                                                                                                                                                                                         | <b>S7</b>  |
| <b>Figure S6.</b> <sup>13</sup> C NMR of NiL <sup>APIP-OH</sup>                                                                                                                                                                                                        | <b>S8</b>  |
| <b>Figure S7.</b> ESI-MS(HRMS) spectrum of NiL <sup>APIP-OH</sup>                                                                                                                                                                                                      | <b>S8</b>  |
| <b>Figure S8.</b> <sup>1</sup> H NMR of NiL <sup>APIP</sup> crystals compare with NiL <sup>APIP-OH</sup>                                                                                                                                                               | <b>S9</b>  |
| <b>Figure S9.</b> EPR silent spectrum of Ni <sup>II</sup> L <sup>APIP</sup>                                                                                                                                                                                            | <b>S10</b> |
| <b>Figure S10.</b> Molecular structure of Ni <sup>II</sup> L <sup>APIP-MeO</sup>                                                                                                                                                                                       | <b>S10</b> |
| <b>Figure S11.</b> <sup>1</sup> H NMR of Ni <sup>II</sup> L <sup>APIP-MeO</sup>                                                                                                                                                                                        | <b>S11</b> |
| <b>Figure S12.</b> ESI-MS (HRMS) spectrum of NiL <sup>IPIP</sup>                                                                                                                                                                                                       | <b>S11</b> |
| <b>Table S1.</b> Redox potentials of cyclic voltammogram of Cu <sup>II</sup> L <sup>APIP</sup> , Ni <sup>II</sup> L <sup>APIP</sup> and Zn <sup>II</sup> L <sup>IPIP</sup> OAc versus Fc <sup>+</sup> / Fc <sup>a</sup>                                                | <b>S12</b> |
| <b>Figure S13.</b> Cyclic voltammogram of Cu <sup>II</sup> L <sup>IPIP</sup> (Red), Ni <sup>II</sup> L <sup>IPIP</sup> (Blue)<br>Conditions: 2.5 mM complex, 0.1 M NBu <sub>4</sub> (BF <sub>4</sub> ), scan rate 200 mV / s, CH <sub>2</sub> Cl <sub>2</sub> , 298 K. | <b>S12</b> |
| <b>Table S2</b> Redox potentials of cyclic voltammogram of Cu <sup>II</sup> L <sup>IPIP</sup> and Ni <sup>II</sup> L <sup>IPIP</sup> versus Fc <sup>+</sup> / Fc                                                                                                       | <b>S12</b> |
| <b>X-Ray Crystallography data of Copper, Zinc and Nickel complexes</b>                                                                                                                                                                                                 | <b>S13</b> |

## Materials and Physical Methods

All reagents and solvents were purchased from commercial sources and were used as received, unless noted otherwise. Anhydrous  $\text{Cu}(\text{OAc})_2$ , 98%. Super dry acetonitrile, dichloromethane were used for synthesis and growing crystal as mentioned. Preparation and handling of air- and moisture-sensitive materials were carried out under an inert gas atmosphere of glove box. NMR spectra were recorded at 400 MHz on a Bruker DRX spectrometer in  $\text{CDCl}_3$  solution. The chemical shifts were referred to TMS using the residual signals from the solvent.

IR spectra were recorded in the solid state on a FT-IR Bruker Vector 22 spectrophotometer in the 400–4000  $\text{cm}^{-1}$  range.

LC-MS mass spectral data were acquired on Shimadzu LCMS 2020.

HRMS spectra were recorded on thermo Fisher scientific LTQ Orbitrap Elite.

Cyclic Voltammetry (CV) was performed on CHI605E, CH Instruments, USA, equipped with a Ag wire reference electrode, a glassy carbon working electrode, and a Pt counter electrode with 0.1 M  $\text{Bu}_4\text{N}(\text{BF}_4)$  solutions in  $\text{CH}_2\text{Cl}_2$ . Ferrocene was used as an internal standard.

## X-ray Crystallographic Analyses

All crystals were placed onto the tip of a 0.1 mm diameter glass capillary and mounted on a Bruker SMART Platform CCD diffractometer for data collection. The data collections were carried out using MoK $\alpha$  radiation with a graphite monochromator ( $\lambda = 0.71073 \text{ \AA}$ ) at 95 K. Structure solutions were performed by direct methods using SHELXS-97 software and refined against F2 using full-matrix-least-squares using SHELXL-97 and SHELXL-2013 software. Data intensities were corrected for absorption and decay (SADABS). Final cell constants were obtained from least squares fits of all measured reflections. All non-hydrogen atoms were refined with anisotropic displacement parameters.

## Material Synthesis

To a solution of 3,5-DTBQ (3,5-di-tert-butylcyclohexa-3,5-diene-1,2-dione) (0.22 g, 1 mmol) in acetonitrile (4 mL) was added 2-aminobenzyl amine (0.122 g, 1 mmol), and the reaction solution stirred for 30 min at the room temperature in the presence of air. After some minutes, it afforded a yellow precipitate (scheme S1).

$^1\text{H NMR}$  (400 MHz, Chloroform-*d*)  $\delta$  8.70 (s, 1H), 7.46 (dd, 1H), 7.28 (dt, 2H), 7.05 (d, 1H), 6.79 (m, 2H), 6.71 (s, 1H), 6.27 (s, 2H), 1.51 (s, 9H), 1.40 (s, 9H)

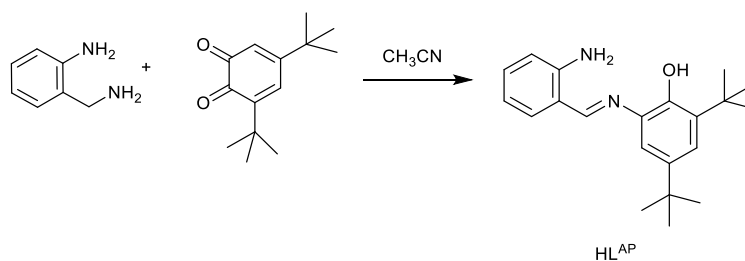

Scheme S1. Synthesis of HL<sup>AP</sup> ligand

Next, to the stirred suspension of HL<sup>AP</sup> (0.324 g, 1 mmol) in acetonitrile was added pyridine-2-carboxaldehyde (0.096 mL, 1 mmol) (Scheme S2). LC-MS data clearly shows the formation of this ligand (Figure S1).

This ligand (HL<sup>PIP</sup>) is stable at dry and inert condition. When it is exposed on moisture, it is hydrolyzed. Therefore, after one minute stirring, different metal precursors of copper, zinc and nickel were added to reaction mixture to afford the metal complexes (Scheme S3).

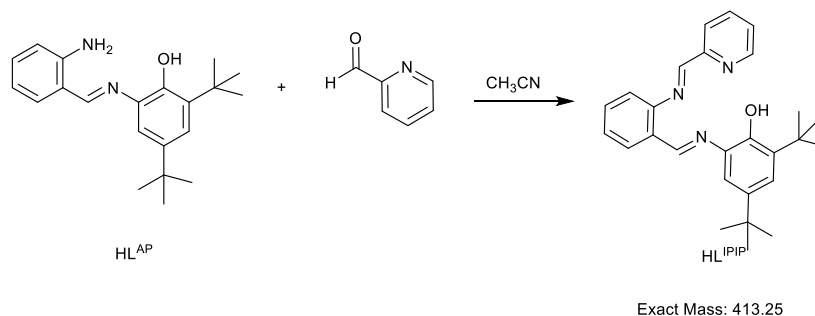

Scheme S2. Synthesis of HL<sup>PIP</sup> ligand

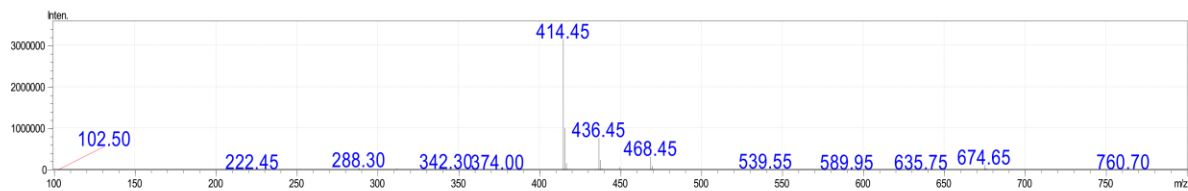

Figure S1. LC-MS spectrum of HL<sup>IPIP</sup>

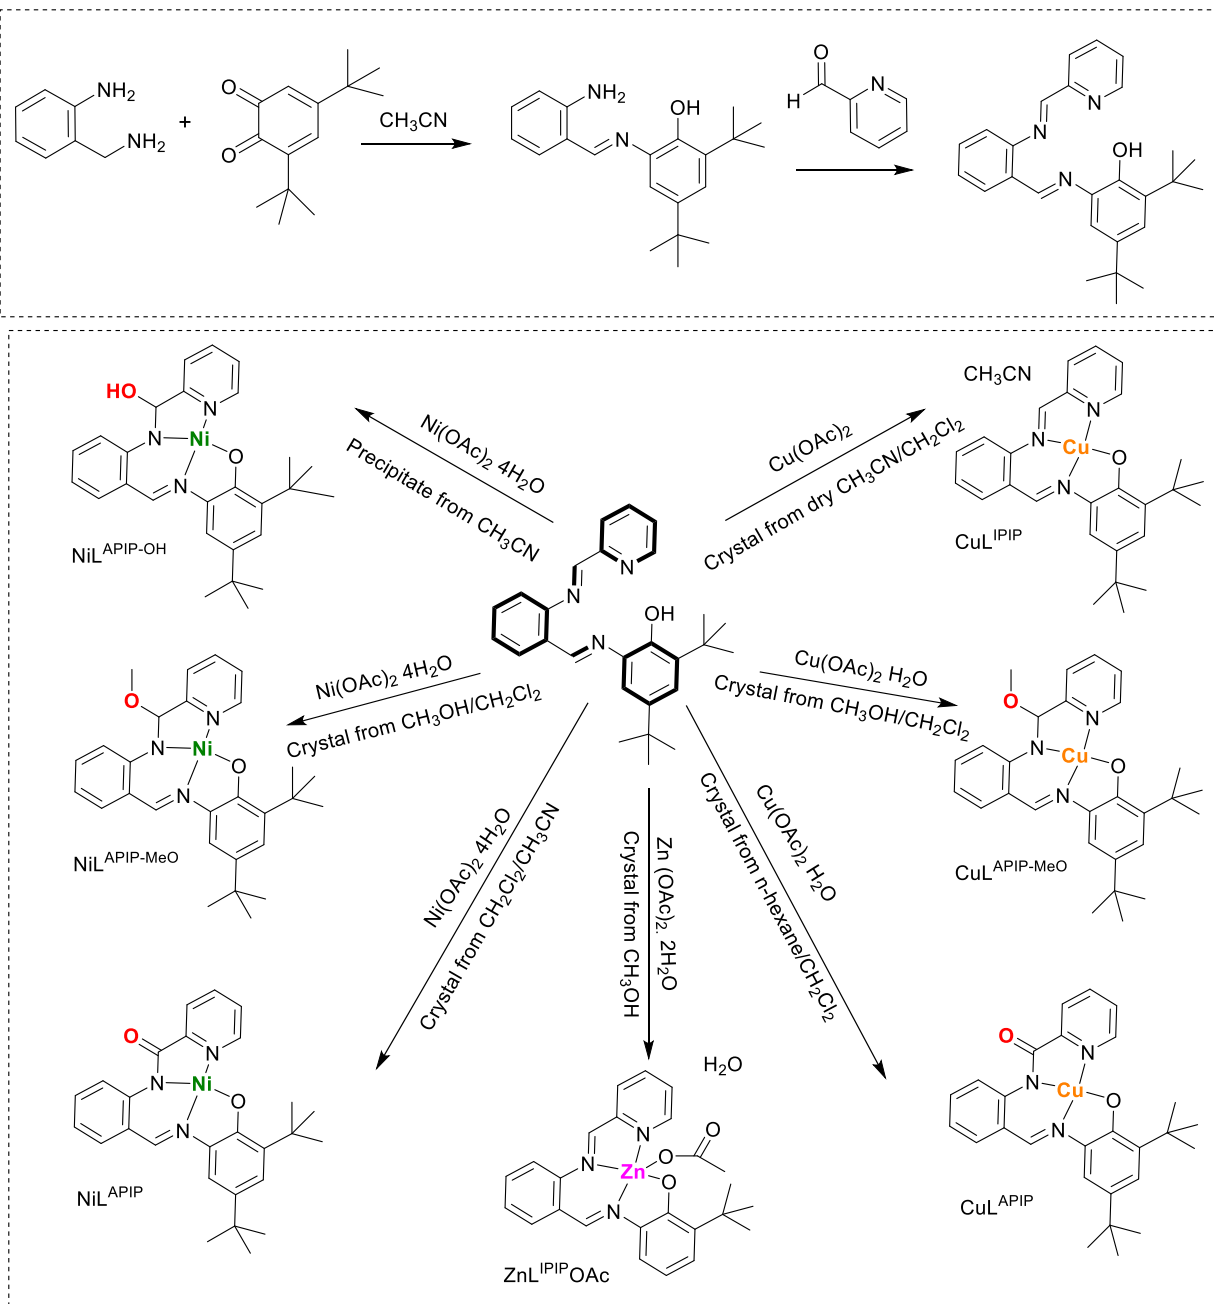

Scheme 3. General scheme for the preparation of the different metal complexes

### Synthesis of Cu<sup>II</sup>L<sup>APIP</sup>

Cu<sup>II</sup>L<sup>APIP</sup> complex was synthesized by the following template reaction. Firstly, to the stirred suspension of HL<sup>AP</sup> (0.324 g, 1 mmol) in acetonitrile was added pyridine-2-carboxaldehyde (0.096 mL, 1 mmol), after one minute stirring Cu(OAc)<sub>2</sub>·H<sub>2</sub>O (0.199 g, 1 mmol) was added in the presence of 2 equivalents of NEt<sub>3</sub> to the reaction mixture.

The stirring of red-brown solution at 298 K for 4 h afforded a red-brown precipitate of copper complex. The filtrate was left undisturbed to afford red brown microcrystals (0.309 g, 63% yield) by evaporation from dichloromethane/acetonitrile solution. X-ray quality dark red single crystals were grown from a 1:1 solvent mixture of n-hexane/dichloromethane. Elemental Analysis: calculated (found) for C<sub>27</sub>H<sub>29</sub>N<sub>3</sub>O<sub>2</sub>Cu·0.35 C<sub>6</sub>H<sub>14</sub>: C 67.05, H 6.55, N 8.06; Found: C 66.79, H 6.61, N 7.76.  $\nu_{\max}(\text{KBr})/\text{cm}^{-1}$ : 2959 (C-H), 1642(C=O), 1466 (C=N), 802 (=C-H bending). ESI-MS m/z : 491.2.

### Synthesis of Cu<sup>II</sup>L<sup>IPIP</sup>

Cu<sup>II</sup>L<sup>IPIP</sup> complex was synthesized by the following template reaction. Firstly, to a stirred suspension of HL<sup>AP</sup> (0.324 g, 1 mmol) in dry acetonitrile was added pyridine-2-carboxaldehyde (0.096 mL, 1 mmol). Next, Cu(OAc)<sub>2</sub> (0.181 g, 1 mmol) was added to the reaction mixture. The stirring of orange-brown solution at 298 K for 4 h afforded a dark orange precipitate of copper complex. X-ray quality dark red single crystals from were grown from dry acetonitrile/dichloromethane. ESI-MS m/z (%):476.1751

### Synthesis of Cu<sup>II</sup>L<sup>APIP-Meo</sup>

To a stirred suspension of HL<sup>AP</sup> (0.324 g, 1 mmol) in acetonitrile was added pyridine-2-carboxaldehyde (0.096 mL, 1 mmol). After one minute stirring, Cu(OAc)<sub>2</sub>·H<sub>2</sub>O (0.199 g, 1 mmol) was added in the presence of 2 equivalents of NEt<sub>3</sub> to the reaction mixture. The stirring of red-brown solution at 298 K for 4 h afforded a red-brown precipitate X-ray quality dark red single crystals were grown from a 1:1 solvent mixture of methanol/dichloromethane.

### Synthesis of Zn<sup>II</sup>L<sup>IPIP</sup>OAc

As reported, to a stirred suspension of HL<sup>AP</sup> (0.324 g, 1 mmol) in acetonitrile was added pyridine-2-carboxaldehyde (0.096 mL, 1 mmol). After one minute stirring, it was reacted immediately with Zn(OAc)<sub>2</sub>·2H<sub>2</sub>O (0.219 g, 1 mmol) to afford the zinc complex of Zn<sup>II</sup>L<sup>IPIP</sup>OAc at the ambient temperature. The stirring of black solution at 298 K for 4 h afforded a dark red-brown precipitate. X-ray quality dark crystals were grown from methanol.

$\nu_{\max}(\text{KBr})/\text{cm}^{-1}$ : 3415 (O-H), 2946 (C-H), 1606 (C=O), 1593 (C=C), 1469 (C=N), 740 (=C-H bending).

<sup>1</sup>H NMR (400 MHz, (CD<sub>3</sub>)<sub>2</sub>SO):  $\delta$  1.29 (s, 9H), 1.45 (s, 9H), 1.59 (s, 3H), 7.1 (d, 1H), 7.4 (d, 1H), 7.6 (m, 2H), 7.8 (dd, 1H), 8.0 (m, 1H), 8.2 (d, 1H), 8.4 (dt, 9Hz 1H), 8.9 (m, 1H), 9.0(s, 1H), 9.1(s, 1H).

<sup>13</sup>C NMR (100 MHz, (CD<sub>3</sub>)<sub>2</sub>SO):  $\delta$  29.82, 30.00, 32.13, 32.21, 34.42, 35.53, 109.79, 121.03, 124.55, 128.99, 129.22, 129.63, 129.74, 132.00, 132.37, 133.54, 135.51, 138.53, 141.90, 145.06, 147.44, 149.99, 153.08, 161.17, 162.71.

### Synthesis of Ni<sup>II</sup>L<sup>APIP-OH</sup>

To a stirred suspension of HL<sup>AP</sup> (0.324 g, 1 mmol) in acetonitrile was added pyridine-2-carboxaldehyde (0.096 mL, 1 mmol) under N<sub>2</sub> atmosphere (Figure S1). After one minute stirring, it was reacted immediately with Ni(OAc)<sub>2</sub>·4H<sub>2</sub>O (1 mmol, 0.248 g) to afford the nickel complex of Ni<sup>II</sup>L<sup>APIP</sup> at the ambient temperature. The stirring of dark orange solution at 298 K for 2 h afforded a precipitate. ESI-MS m/z (%):488.1843

<sup>1</sup>H NMR (400 MHz, DMSO-*d*<sub>6</sub>)  $\delta$  8.80 (s, 1H), 8.60 (dt, *J* = 5.31, 1.46 Hz, 1H), 8.10 (td, *J* = 7.69, 1.57 Hz, 1H), 7.77 (dd, *J* = 7.41, 1.84 Hz, 2H), 7.64 (dd, *J* = 7.61, 5.22 Hz, 2H), 7.37 (d, *J* = 8.91 Hz, 1H), 7.24 (ddd, *J* = 8.73, 6.63, 1.74 Hz, 1H), 6.96 (d, *J* = 2.09 Hz, 1H), 6.60 (ddd, *J* = 7.75, 6.60, 0.97 Hz, 1H), 6.34 (d, *J* = 10.12 Hz, 1H), 6.07 (d, *J* = 10.06 Hz, 1H), 1.45 (s, 9H), 1.33 (s, 9H).

<sup>13</sup>C NMR (101 MHz, DMSO)  $\delta$  29.76, 32.42, 34.60, 34.87, 88.40, 110.02, 113.87, 116.86, 120.66, 120.92, 124.91, 131.49, 134.54, 140.14, 141.14, 146.24, 148.21, 149.08, 160.14, 166.57.

### Synthesis of Ni<sup>II</sup>L<sup>APIP</sup>

Solvent slow evaporation of Ni<sup>II</sup>L<sup>APIP-OH</sup> solution from dichloromethane/acetonitrile afforded single crystal of Ni<sup>II</sup>L<sup>APIP</sup>. ESI-MS m/z (%):486.1880

### Synthesis of Ni<sup>II</sup>L<sup>IPIP</sup>

To a stirred suspension of HL<sup>AP</sup> (0.324 g, 1 mmol) in superdry acetonitrile was added pyridine-2-carboxaldehyde (0.096 mL, 1 mmol) under N<sub>2</sub> atmosphere. After one minute stirring, it was reacted immediately with Ni(OAc)<sub>2</sub> (1 mmol, 0.176 g) to afford the nickel complex of Ni<sup>II</sup>L<sup>IPIP</sup> at the ambient temperature. The stirring of dark orange solution at 298 K for 2 h afforded a precipitate. ESI-MS m/z (%):471.1808

### Synthesis of Ni<sup>II</sup>L<sup>APIP-MeO</sup>

To a stirred suspension of HL<sup>AP</sup> (0.324 g, 1 mmol) in acetonitrile was added pyridine-2-carboxaldehyde (0.096 mL, 1 mmol). After one minute stirring, it was reacted immediately with Ni(OAc)<sub>2</sub>·4H<sub>2</sub>O (1 mmol, 0.248 g) to afford the nickel complex at the ambient temperature. The stirring of dark orange solution at 298 K for 4 h afforded a precipitate. X-ray quality dark crystals were grown from dichloromethane/methanol.

<sup>1</sup>H NMR (400 MHz, DMSO-*d*<sub>6</sub>) δ 8.85 (s, 1H), 8.64 (ddd, *J* = 5.60, 1.54, 0.74 Hz, 1H), 8.17 (td, *J* = 7.67, 1.56 Hz, 1H), 7.87 – 7.77 (m, 2H), 7.77 – 7.65 (m, 2H), 7.38 (d, *J* = 8.84 Hz, 1H), 7.28 (ddd, *J* = 8.73, 6.66, 1.76 Hz, 1H), 6.98 (d, *J* = 2.06 Hz, 1H), 6.67 (ddd, *J* = 7.86, 6.70, 1.01 Hz, 1H), 6.30 (s, 1H), 3.01 (s, 3H), 1.45 (s, 9H), 1.33 (s, 9H).

## Figures and Tables

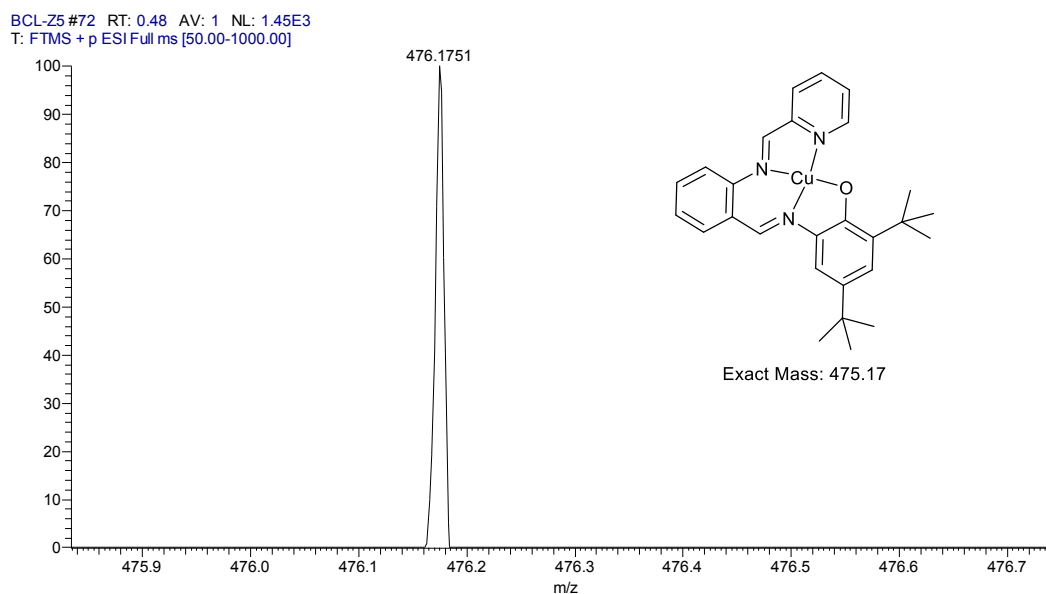

Figure S2. ESI-MS (HRMS) spectrum of CuL<sup>IPIP</sup>

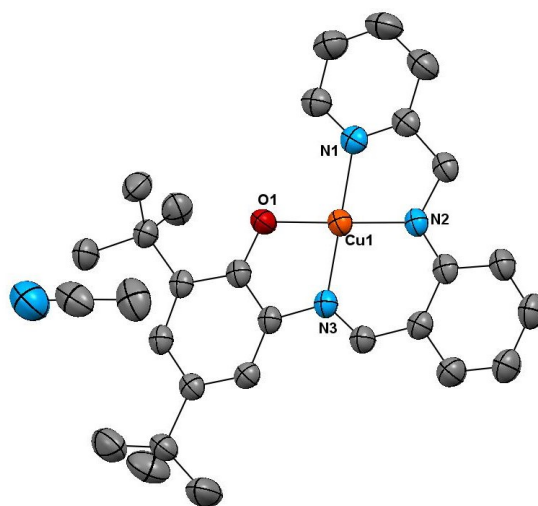

Figure S3. Molecular structure of Cu<sup>II</sup>L<sup>IPIP</sup>. Hydrogen atoms have been omitted for clarity. Thermal ellipsoids are set at 50 % probability. Acetonitrile molecule with the occupancy set to 50% was also found in the structure

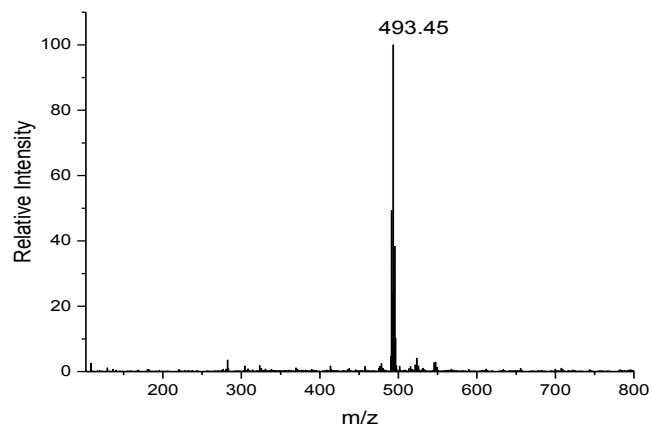

Figure S4. Isotope experiment of the reactions aminophenol-iminopyridine ligand and  $\text{Cu}(\text{OAc})_2$  in the presence of  $\text{H}_2^{18}\text{O}$ .

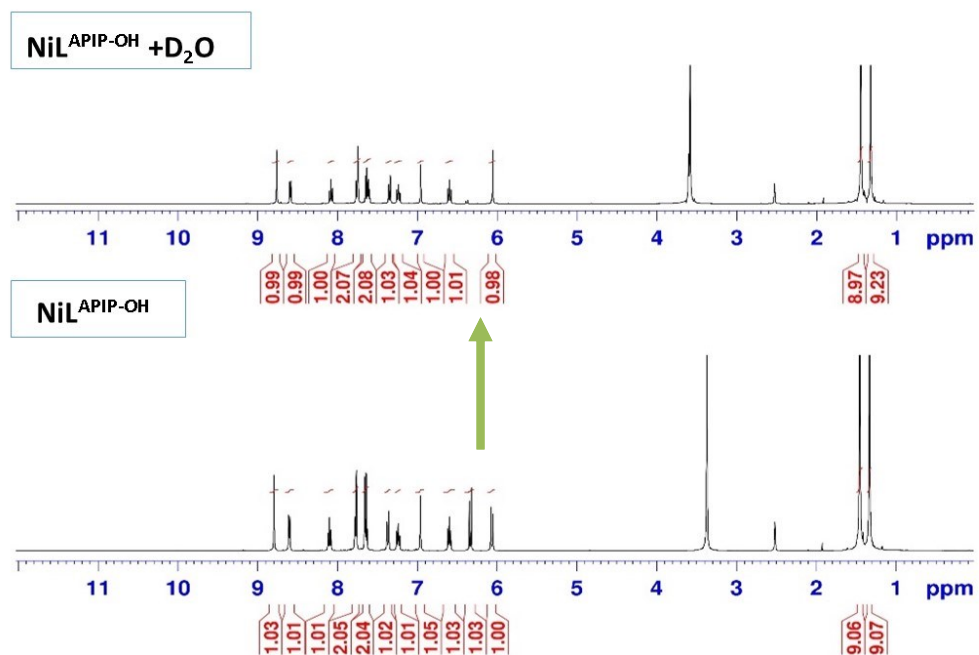

Figure S5.  $^1\text{H}$  NMR of  $\text{NiL}^{\text{APIP-OH}}$

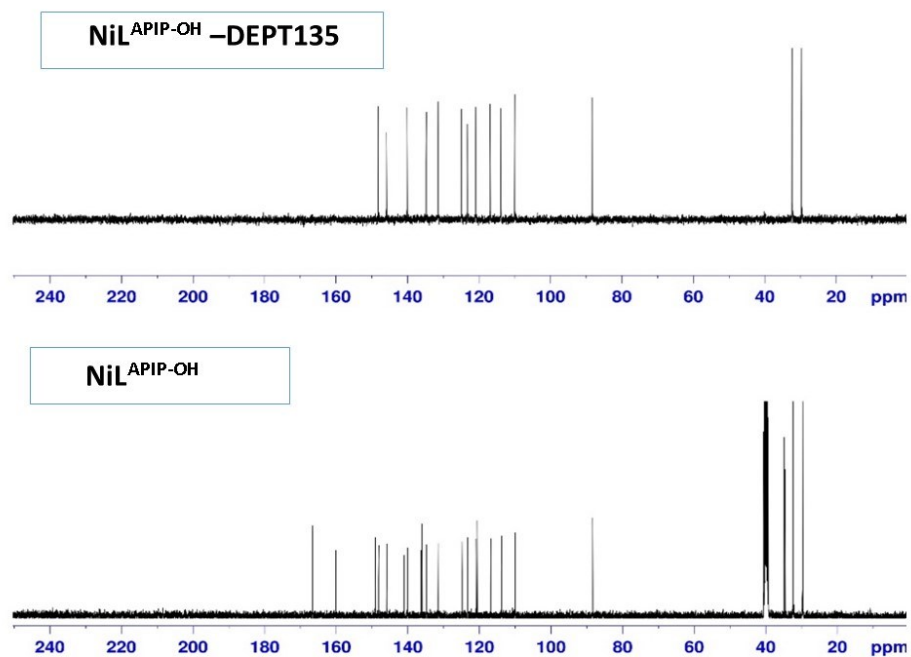

Figure S6. <sup>13</sup>C NMR of NiL<sup>APIP-OH</sup>

BCL-Z3 #41 RT: 0.28 AV: 1 NL: 7.72E2  
T: FTMS + p ESI Full ms [50.00-1000.00]

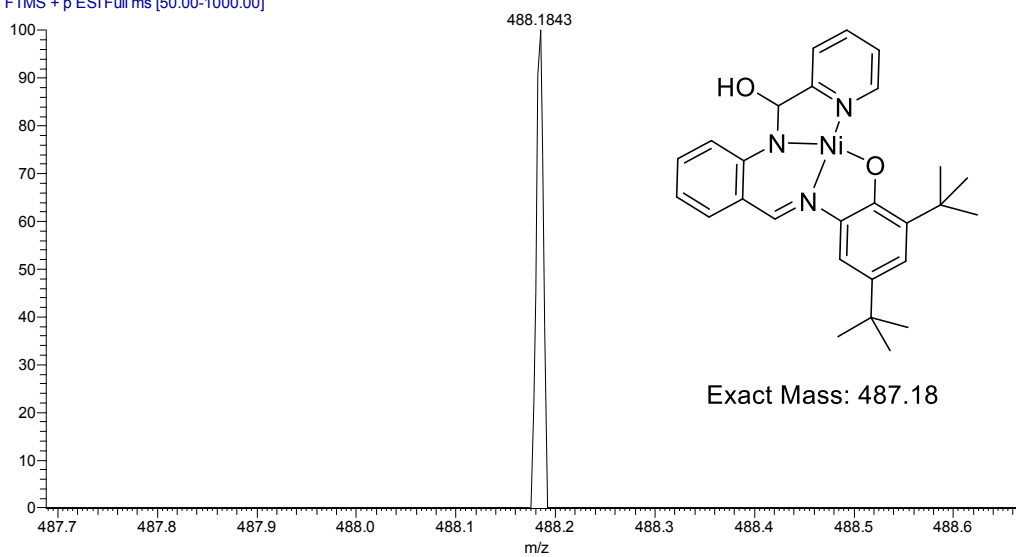

Figure S7. ESI-MS (HRMS) spectrum of NiL<sup>APIP-OH</sup>



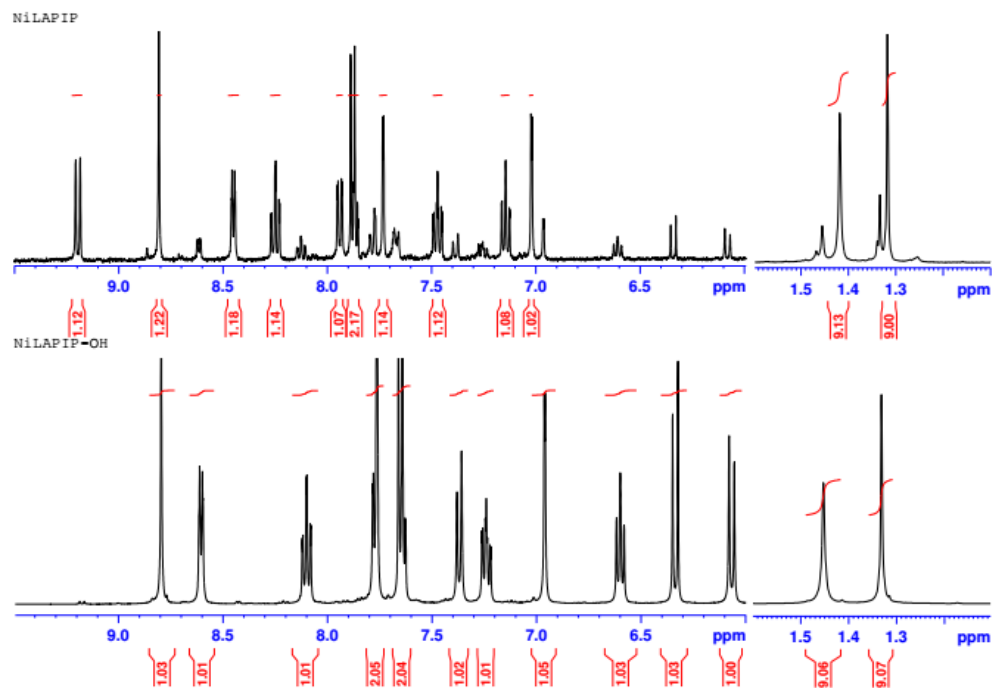

**Figure S8.** <sup>1</sup>H NMR of NiL<sup>APIP</sup> crystals (top) compare with NiL<sup>APIP-OH</sup> (down);  
 (There is a small amount of NiL<sup>APIP-OH</sup> impurity in NiL<sup>APIP</sup> crystals, revealing gradually oxidation of imine moiety to amide)

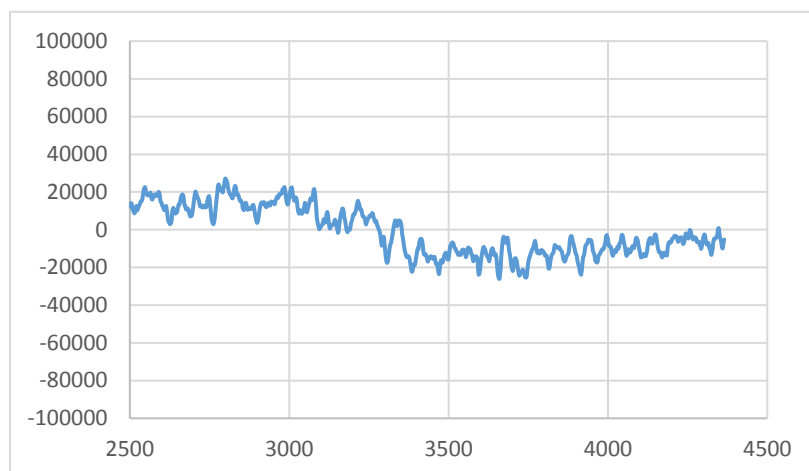

**Figure S9.** EPR silent spectrum of  $\text{Ni}^{\text{II}}\text{L}^{\text{APIP}}$

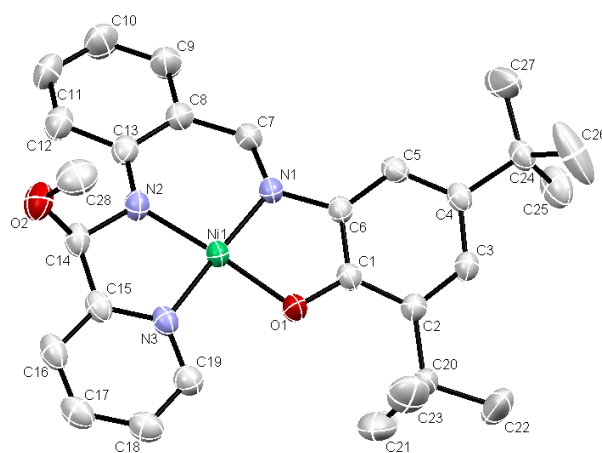

**Figure S10.** Molecular structure of  $\text{Ni}^{\text{II}}\text{L}^{\text{APIP-OMe}}$ . Hydrogen atoms have been omitted for clarity. Thermal ellipsoids are set at 50 % probability

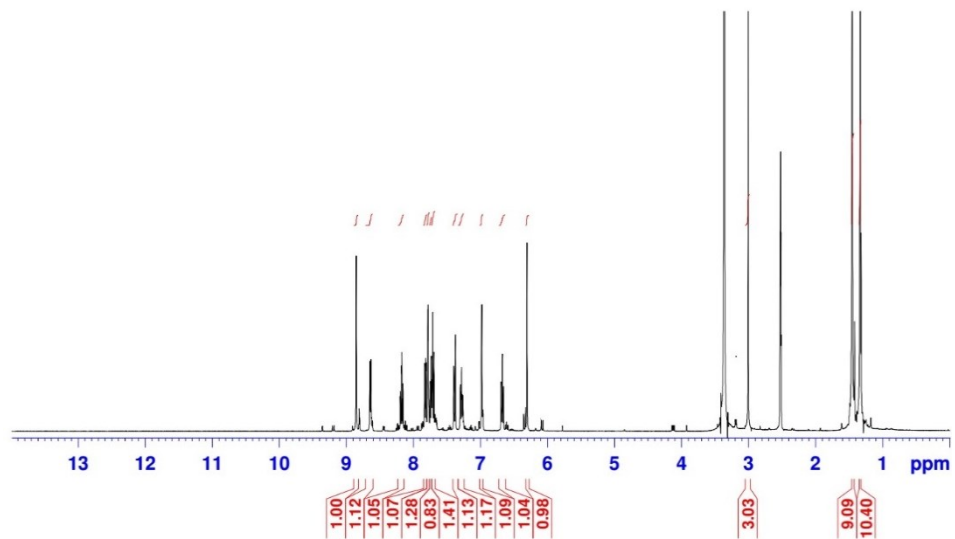

Figure S11.  $^1\text{H}$  NMR of  $\text{Ni}^{\text{II}}\text{L}^{\text{APIP-MeO}}$

BCL-Z1 #20 RT: 0.18 AV: 1 NL: 1.63E3  
 T: FTMS + p ESI Full ms [50.00-1000.00]

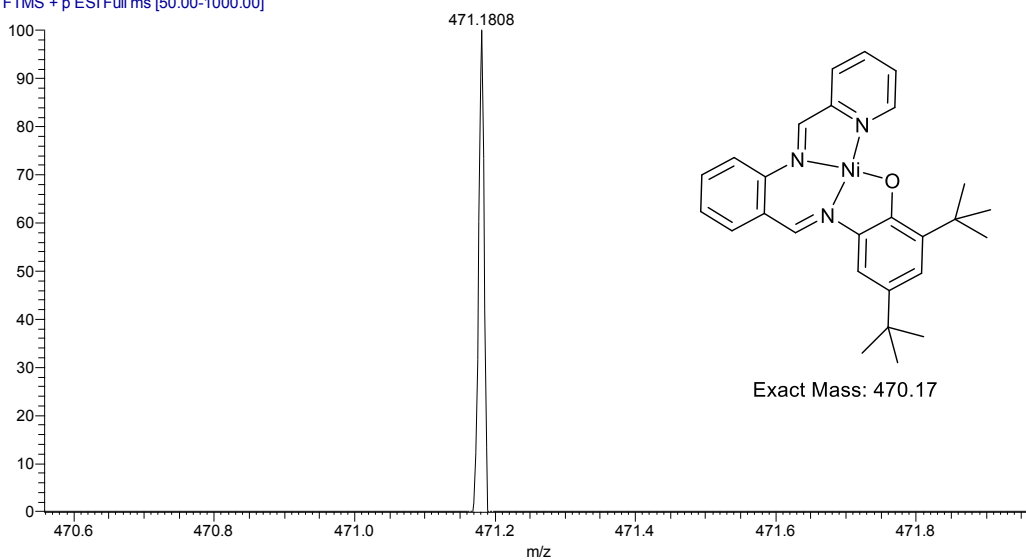

Figure S12. ESI-MS (HRMS) spectrum of  $\text{NiL}^{\text{IPIP}}$

**Table S1.** Redox potentials of cyclic voltammogram of  $\text{Cu}^{\text{II}}\text{L}^{\text{APIP}}$ ,  $\text{Ni}^{\text{II}}\text{L}^{\text{APIP}}$  and  $\text{Zn}^{\text{II}}\text{L}^{\text{IPIP}}\text{OAc}$  versus  $\text{Fc}^+ / \text{Fc}^{\ominus}$ .

| compound                                                | $E_{1/2}^1 / \text{V}$ | $E_{1/2}^2 / \text{V}$ |
|---------------------------------------------------------|------------------------|------------------------|
| $\text{Cu}^{\text{II}}\text{L}^{\text{APIP}}$           | +0.41                  | -1.66                  |
| $\text{Ni}^{\text{II}}\text{L}^{\text{APIP}}$           | +0.51                  | -1.81                  |
| $\text{Zn}^{\text{II}}\text{L}^{\text{IPIP}}\text{OAc}$ | +0.27                  | -1.47                  |

<sup>a</sup>Peak to peak difference for the  $\text{Fc}^+ / \text{Fc}$  couple at 298 K is 0.12

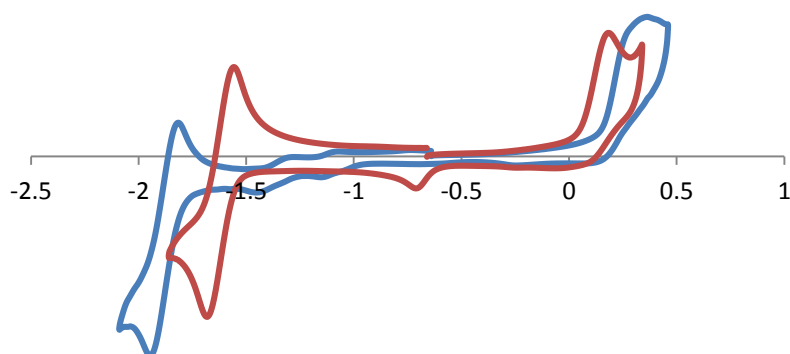

**Figure S13.** Cyclic voltammogram of  $\text{Cu}^{\text{II}}\text{L}^{\text{IPIP}}$  (Red),  $\text{Ni}^{\text{II}}\text{L}^{\text{APIP}}$  (Blue) Conditions: 2.5 mM complex, 0.1 M  $\text{NBu}_4(\text{BF}_4)$ , scan rate 200 mV / s,  $\text{CH}_2\text{Cl}_2$ , 298 K.

**Table S2** Redox potentials of cyclic voltammogram of  $\text{Cu}^{\text{II}}\text{L}^{\text{IPIP}}$  and  $\text{Ni}^{\text{II}}\text{L}^{\text{APIP}}$  versus  $\text{Fc}^+ / \text{Fc}^{\ominus}$ .

| compound                                      | $E_{1/2}^1 / \text{V}$ | $E_{1/2}^2 / \text{V}$ |
|-----------------------------------------------|------------------------|------------------------|
| $\text{Cu}^{\text{II}}\text{L}^{\text{IPIP}}$ | +0.21                  | -1.60                  |
| $\text{Ni}^{\text{II}}\text{L}^{\text{APIP}}$ | +0.32                  | -1.89                  |

## X-Ray Crystallography data of Copper, Zinc and nickel complexes

Table S1. Crystallographic data for Cu<sup>II</sup>L<sup>APIP</sup>

| Cu <sup>II</sup> L <sup>APIP</sup>                            |                                                                  |
|---------------------------------------------------------------|------------------------------------------------------------------|
| Empirical formula                                             | C <sub>27</sub> H <sub>29</sub> Cu N <sub>3</sub> O <sub>2</sub> |
| Formula weight                                                | 491.09                                                           |
| Crystal system                                                | Monoclinic                                                       |
| Space group                                                   | <i>P</i> 1 2 <sub>1</sub> /c 1                                   |
| <i>a</i> (Å)                                                  | 9.5598(5)                                                        |
| <i>b</i> (Å)                                                  | 18.2903(9)                                                       |
| <i>c</i> (Å)                                                  | 14.1699(8)                                                       |
| $\alpha$ (deg)                                                | 90                                                               |
| $\beta$ (deg)                                                 | 107.231(2)                                                       |
| $\gamma$ (deg)                                                | 90                                                               |
| <i>V</i> (Å <sup>3</sup> )                                    | 2366.4(2)                                                        |
| <i>Z</i>                                                      | 4                                                                |
| <i>T</i> (K)                                                  | 150(2)                                                           |
| $\rho_{\text{calcd}}$ (g/cm <sup>3</sup> )                    | 1.378                                                            |
| $\mu$ (mm <sup>-1</sup> )                                     | 0.952                                                            |
| Reflections collected                                         | 57791                                                            |
| Significant reflections                                       | 9306                                                             |
| <i>R</i> [ <i>I</i> > 2.5 $\sigma$ ( <i>I</i> )]              | 0.0450                                                           |
| <i>R</i> <sub>w</sub> [ <i>I</i> > 2.5 $\sigma$ ( <i>I</i> )] | 0.0999                                                           |
| Goodness of fit                                               | 0.7317                                                           |

Table S2. Selected bond lengths of Cu<sup>II</sup>L<sup>APIP</sup>

| Bond             | L <sup>APIP</sup> Cu <sup>II</sup> |
|------------------|------------------------------------|
| Cu(1)-N(2)       | 1.955 (1.958)                      |
| Cu(1)-N(3)       | 1.955 (1.972)                      |
| Cu(1)-N(4)       | 1.921 (1.924)                      |
| Cu(1)-O(5)       | 1.901 (1.895)                      |
| C(17)-O(5)       | 1.322 (1.326)                      |
| C(22)-N(4)       | 1.414 (1.412)                      |
| C(23)-N(4)       | 1.284 (1.297)                      |
| <b>C(6)-N(2)</b> | <b>1.400 (1.400)</b>               |
| <b>C(6)-O(2)</b> | <b>1.230 (1.230)</b>               |

**Table S3.** Crystallographic data for Cu<sup>II</sup>L<sup>PIP</sup>

|                                            | L <sup>PIP</sup> Cu <sup>II</sup>                   |
|--------------------------------------------|-----------------------------------------------------|
| Empirical formula                          | C <sub>29</sub> H <sub>33</sub> Cu N <sub>4</sub> O |
| Formula weight                             | 517.14                                              |
| Crystal system                             | Orthorhombic                                        |
| Space group                                | <i>Pnma</i>                                         |
| <i>a</i> (Å)                               | 24.983(3)                                           |
| <i>b</i> (Å)                               | 6.9452(7)                                           |
| <i>c</i> (Å)                               | 16.3797(17)                                         |
| $\alpha$ (deg)                             | 90.00                                               |
| $\beta$ (deg)                              | 90.00                                               |
| $\gamma$ (deg)                             | 90.00                                               |
| <i>V</i> (Å <sup>3</sup> )                 | 2842.1                                              |
| <i>Z</i>                                   | 4                                                   |
| <i>T</i> (K)                               | 296                                                 |
| $\rho_{\text{calcd}}$ (g/cm <sup>3</sup> ) | 1.209                                               |
| $\mu$ (mm <sup>-1</sup> )                  | 0.794                                               |
| Significant reflections                    | 6328                                                |
| $R[I > 2.5\sigma(I)]$                      | 0.0561                                              |
| $R_w[I > 2.5\sigma(I)]$                    | 0.1637                                              |
| Goodness of fit                            | 0.997                                               |

**Table S4.** Selected bond lengths of Cu<sup>II</sup>L<sup>PIP</sup>

| Number | Atom1 | Atom2 | Length |
|--------|-------|-------|--------|
| 1      | Cu1   | N1    | 1.965  |
| 2      | Cu1   | O1    | 1.912  |
| 3      | Cu1   | N2    | 1.903  |
| 4      | Cu1   | N3    | 1.928  |
| 5      | H1    | C1    | 1.01   |
| 6      | N1    | C1    | 1.343  |
| 7      | N1    | C5    | 1.322  |
| 8      | O1    | C19   | 1.331  |
| 9      | C1    | C2    | 1.372  |
| 10     | C2    | H2    | 0.82   |
| 11     | C2    | C3    | 1.37   |
| 12     | N2    | C7    | 1.366  |
| 13     | N2    | C6    | 1.44   |
| 14     | C3    | H3    | 0.85   |
| 15     | C3    | C4    | 1.385  |
| 16     | N3    | C13   | 1.298  |
| 17     | N3    | C14   | 1.417  |
| 18     | C4    | H4    | 0.995  |

**Table S5.** Crystallographic data for Cu<sup>II</sup>L<sup>APIP-MeO</sup>

| Cu <sup>II</sup> L <sup>APIP-MeO</sup>     |                                                                  |
|--------------------------------------------|------------------------------------------------------------------|
| Empirical formula                          | C <sub>28</sub> H <sub>33</sub> Cu N <sub>3</sub> O <sub>2</sub> |
| Formula weight                             | 507.12                                                           |
| Crystal system                             | Orthorhombic                                                     |
| Space group                                | <i>Pbca</i>                                                      |
| <i>a</i> (Å)                               | 15.8660(8)                                                       |
| <i>b</i> (Å)                               | 14.5267(7)                                                       |
| <i>c</i> (Å)                               | 22.0264(11)                                                      |
| $\alpha$ (deg)                             | 90.00                                                            |
| $\beta$ (deg)                              | 90.00                                                            |
| $\gamma$ (deg)                             | 90.00                                                            |
| <i>V</i> (Å <sup>3</sup> )                 | 5076.66                                                          |
| <i>Z</i>                                   | 8                                                                |
| <i>T</i> (K)                               | 296                                                              |
| $\rho_{\text{calcd}}$ (g/cm <sup>3</sup> ) | 1.327                                                            |
| $\mu$ (mm <sup>-1</sup> )                  | 0.890                                                            |
| Significant reflections                    | 6328                                                             |
| $R[I > 2.5\sigma(I)]$                      | 0.0470                                                           |
| $R_w[I > 2.5\sigma(I)]$                    | 0.1261                                                           |
| Goodness of fit                            | 0.997                                                            |

**Table S6.** Selected bond lengths of Cu<sup>II</sup>L<sup>APIP-MeO</sup>

| Number | Atom1 | Atom2 | Length   |
|--------|-------|-------|----------|
| 1      | Cu1   | N1    | 1.963(2) |
| 2      | Cu1   | N2    | 1.911(2) |
| 3      | Cu1   | N3    | 1.919(2) |
| 4      | Cu1   | O1    | 1.902(2) |
| 5      | N1    | C5    | 1.333(3) |
| 6      | N1    | C1    | 1.339(4) |
| 7      | N2    | C6    | 1.429(4) |
| 8      | N2    | C7    | 1.368(3) |
| 9      | N3    | C14   | 1.423(3) |
| 10     | N3    | C13   | 1.293(3) |
| 11     | O1    | C19   | 1.320(3) |
| 12     | C4    | C5    | 1.379(4) |
| 13     | C4    | C3    | 1.367(5) |
| 14     | C4    | H4    | 0.88(3)  |
| 15     | C5    | C6    | 1.508(4) |
| 16     | C6    | H6    | 1.09(2)  |
| 17     | C6    | O2    | 1.451(3) |
| 18     | C1    | C2    | 1.368(4) |
| 19     | C1    | H1    | 0.91(3)  |
| 20     | C2    | C3    | 1.366(5) |

|    |     |     |          |
|----|-----|-----|----------|
| 21 | C2  | H2  | 0.85(3)  |
| 22 | C3  | H3  | 0.86(3)  |
| 23 | C19 | C14 | 1.407(4) |
| 24 | C19 | C18 | 1.418(4) |
| 25 | C14 | C15 | 1.391(4) |
| 26 | C18 | C17 | 1.382(4) |
| 27 | C18 | C20 | 1.538(4) |
| 28 | C16 | C15 | 1.378(4) |
| 29 | C16 | C17 | 1.396(4) |
| 30 | C16 | C24 | 1.537(4) |
| 31 | C13 | C12 | 1.433(4) |
| 32 | C13 | H13 | 0.92(3)  |
| 33 | C15 | H15 | 0.89(2)  |
| 34 | C12 | C7  | 1.426(4) |
| 35 | C12 | C11 | 1.409(4) |
| 36 | C7  | C8  | 1.419(4) |
| 37 | C11 | C10 | 1.362(5) |
| 38 | C11 | H11 | 0.89(3)  |
| 39 | C17 | H17 | 0.93(3)  |

**Table S7.** Crystallographic data for ZnL<sup>API</sup>OAc

| <b>Zn<sup>II</sup>L<sup>API</sup>OAc</b>       |                           |
|------------------------------------------------|---------------------------|
| Empirical formula                              | C29 H34 N3 O3.50 Zn       |
| Formula weight                                 | 545.96                    |
| Temperature, K                                 | 293(2)                    |
| Wavelength; Å                                  | 0.71073                   |
| Crystal system, space group                    | Triclinic, P-1            |
| Unit cell dimensions; Å, °                     | a = 10.1927(13)           |
|                                                | b = 10.2059(12)           |
|                                                | c = 14.7907(19)           |
|                                                | alpha = 94.834(10)        |
|                                                | beta = 98.779(11)         |
|                                                | gamma = 114.583(12)       |
| Volume; Å <sup>3</sup>                         | 1364.0(3)                 |
| Z, Calculated density; Mg/m <sup>3</sup>       | 2, 1.329                  |
| Absorption coefficient; mm <sup>-1</sup>       | 0.937                     |
| Goodness-of-fit on F <sup>2</sup>              | 1.073                     |
| Final R indices [I>2sigma(I)]                  | R1 = 0.0631, wR2 = 0.1711 |
| R indices (all data)                           | R1 = 0.0871, wR2 = 0.2184 |
| Largest diff. peak and hole; e.Å <sup>-3</sup> | 0.891 and -0.568          |



**Table S8.** Bond lengths of ZnL<sup>IP</sup>OAc

| Bond length |          | Angles      |                   |
|-------------|----------|-------------|-------------------|
| Zn1-O1      | 1.978(3) | O1-Zn1-O2   | <b>111.95(14)</b> |
| Zn1-O2      | 1.991(4) | O1-Zn1-N1   | <b>81.73(12)</b>  |
| Zn1-N1      | 2.087(3) | O2-Zn1-N1   | <b>117.06(15)</b> |
| Zn1-N3      | 2.109(4) | O1-Zn1-N3   | <b>96.71(13)</b>  |
| Zn1-N2      | 2.174(3) | O2-Zn1-N3   | <b>105.45(15)</b> |
| O1-C1       | 1.311(5) | N1-Zn1-N3   | <b>134.79(14)</b> |
| C1-C2       | 1.431(5) | O1-Zn1-N2   | <b>153.35(14)</b> |
| C1-C6       | 1.432(5) | O2-Zn1-N2   | <b>94.67(13)</b>  |
| C2-C3       | 1.392(5) | N1-Zn1-N2   | <b>85.04(13)</b>  |
| C2-C20      | 1.543(5) | N3-Zn1-N2   | <b>76.60(13)</b>  |
| C3-C4       | 1.391(6) | C1-O1-Zn1   | <b>114.7(2)</b>   |
| C4-C5       | 1.390(6) | O1-C1-C2    | <b>123.0(3)</b>   |
| C4-C24      | 1.546(6) | O1-C1-C6    | <b>119.8(3)</b>   |
| C5-C6       | 1.386(5) | C2-C1-C6    | <b>117.1(3)</b>   |
| C6-N1       | 1.426(5) | C3-C2-C1    | <b>119.1(3)</b>   |
| N1-C7       | 1.281(5) | C3-C2-C20   | <b>121.3(4)</b>   |
| C7-C8       | 1.471(6) | C1-C2-C20   | <b>119.6(3)</b>   |
| C8-C9       | 1.394(6) | C4-C3-C2    | <b>123.5(4)</b>   |
| C8-C13      | 1.428(6) | C5-C4-C3    | <b>117.5(4)</b>   |
| C9-C10      | 1.390(6) | C5-C4-C24   | <b>121.5(4)</b>   |
| C10-C11     | 1.364(7) | C3-C4-C24   | <b>121.1(4)</b>   |
| C11-C12     | 1.383(7) | C6-C5-C4    | <b>121.8(4)</b>   |
| C12-C13     | 1.394(6) | C5-C6-N1    | <b>125.2(4)</b>   |
| C13-N2      | 1.419(5) | C5-C6-C1    | <b>121.1(4)</b>   |
| N2-C14      | 1.249(6) | N1-C6-C1    | <b>113.6(3)</b>   |
| C14-C15     | 1.465(6) | C7-N1-C6    | <b>123.5(3)</b>   |
| C15-N3      | 1.354(6) | C7-N1-Zn1   | <b>126.2(3)</b>   |
| C15-C16     | 1.374(6) | C6-N1-Zn1   | <b>110.1(2)</b>   |
| C16-C17     | 1.389(7) | N1-C7-C8    | <b>127.2(4)</b>   |
| C17-C18     | 1.400(8) | C9-C8-C13   | <b>116.8(4)</b>   |
| C18-C19     | 1.380(7) | C9-C8-C7    | <b>116.5(4)</b>   |
| C19-N3      | 1.326(6) | C13-C8-C7   | <b>126.7(4)</b>   |
| C20-C21     | 1.528(7) | C10-C9-C8   | <b>121.7(4)</b>   |
| C20-C23     | 1.531(7) | C11-C10-C9  | <b>120.9(4)</b>   |
| C20-C22     | 1.552(6) | C10-C11-C12 | <b>119.7(4)</b>   |
| C24-C27     | 1.493(9) | C11-C12-C13 | <b>120.6(4)</b>   |
| C24-C25     | 1.502(7) | C12-C13-N2  | <b>121.8(4)</b>   |
| C24-C26     | 1.569(8) | C12-C13-C8  | <b>120.4(4)</b>   |
| O2-C28      | 1.209(7) | N2-C13-C8   | <b>117.8(4)</b>   |
| C28-O3      | 1.246(7) | C14-N2-C13  | <b>121.6(4)</b>   |
| C28-C29     | 1.528(9) | C14-N2-Zn1  | <b>114.3(3)</b>   |
|             |          | C13-N2-Zn1  | <b>124.0(3)</b>   |
|             |          | N2-C14-C15  | <b>118.9(4)</b>   |
|             |          | N3-C15-C16  | <b>122.5(4)</b>   |
|             |          | N3-C15-C14  | <b>115.5(4)</b>   |
|             |          | C16-C15-C14 | <b>121.9(4)</b>   |
|             |          | C15-C16-C17 | <b>118.6(5)</b>   |
|             |          | C16-C17-C18 | <b>118.7(5)</b>   |
|             |          | C19-C18-C17 | <b>119.1(5)</b>   |
|             |          | N3-C19-C18  | <b>122.0(5)</b>   |

**Table S9.** Crystallographic data for Ni<sup>II</sup>L<sup>APIP</sup>

| Ni <sup>II</sup> L <sup>APIP</sup>                                          |                                                                  |
|-----------------------------------------------------------------------------|------------------------------------------------------------------|
| <b>Empirical formula</b>                                                    | C <sub>27</sub> H <sub>29</sub> Ni N <sub>3</sub> O <sub>2</sub> |
| <b>Formula weight</b>                                                       | 486.22                                                           |
| <b>Crystal system</b>                                                       | Monoclinic                                                       |
| <b>Space group</b>                                                          | <i>P</i> 2 <sub>1</sub> / <i>c</i>                               |
| <b><i>a</i> (Å)</b>                                                         | 9.7052(6)                                                        |
| <b><i>b</i> (Å)</b>                                                         | 18.0704(11)                                                      |
| <b><i>c</i> (Å)</b>                                                         | 14.1301(10)                                                      |
| <b><math>\alpha</math> (deg)</b>                                            | 90                                                               |
| <b><math>\beta</math> (deg)</b>                                             | 107.8527(15)                                                     |
| <b><math>\gamma</math> (deg)</b>                                            | 90                                                               |
| <b><i>V</i> (Å<sup>3</sup>)</b>                                             | 2358.77                                                          |
| <b><i>Z</i></b>                                                             | 4                                                                |
| <b><i>T</i> (K)</b>                                                         | 296                                                              |
| <b><math>\rho_{\text{calcd}}</math> (g/cm<sup>3</sup>)</b>                  | 1.369                                                            |
| <b><math>\mu</math> (mm<sup>-1</sup>)</b>                                   | 0.852                                                            |
| <b><i>R</i>[<i>I</i> &gt; 2.5<math>\sigma</math>(<i>I</i>)]</b>             | 0.04361                                                          |
| <b><i>R</i><sub>w</sub>[<i>I</i> &gt; 2.5<math>\sigma</math>(<i>I</i>)]</b> | 0.1353                                                           |
| <b>Goodness of fit</b>                                                      | 0.7317                                                           |

**Table S10.** Selected bond lengths of Ni<sup>II</sup>L<sup>APIP</sup>

| Atom1 | Atom2 | Length   |
|-------|-------|----------|
| Ni1   | N1    | 1.846(2) |
| Ni1   | O1    | 1.838(2) |
| Ni1   | N2    | 1.885(2) |
| Ni1   | N3    | 1.888(2) |
| N1    | C13   | 1.287(4) |
| N1    | C14   | 1.417(3) |
| O1    | C19   | 1.333(2) |
| C1    | C2    | 1.378(4) |
| C1    | N2    | 1.329(4) |
| C2    | H2    | 0.929(3) |
| C2    | C3    | 1.378(4) |
| O2    | C6    | 1.224(3) |
| N2    | C5    | 1.342(3) |
| C3    | H3    | 0.929(3) |
| C3    | C4    | 1.379(4) |
| N3    | C6    | 1.379(3) |
| N3    | C7    | 1.393(4) |
| C5    | C6    | 1.487(4) |
| C5    | C4    | 1.380(4) |
| C7    | C8    | 1.410(4) |
| C7    | C12   | 1.412(4) |

**Table S11.** Crystallographic data for for monoclinic form of Ni<sup>II</sup>L<sup>APIP</sup>-MeO

| Ni <sup>II</sup> L <sup>APIP</sup> -MeO                                     |                                                                  |
|-----------------------------------------------------------------------------|------------------------------------------------------------------|
| <b>Empirical formula</b>                                                    | C <sub>28</sub> H <sub>33</sub> N <sub>3</sub> Ni O <sub>2</sub> |
| <b>Formula weight</b>                                                       | 502.28                                                           |
| <b>Crystal system</b>                                                       | Monoclinic                                                       |
| <b>Space group</b>                                                          | <i>P</i> 2 <sub>1</sub> / <i>c</i>                               |
| <b><i>a</i> (Å)</b>                                                         | 11.5267(8) Å                                                     |
| <b><i>b</i> (Å)</b>                                                         | 16.6156(10) Å                                                    |
| <b><i>c</i> (Å)</b>                                                         | 13.6845(9)                                                       |
| <b><math>\alpha</math> (deg)</b>                                            | 90                                                               |
| <b><math>\beta</math> (deg)</b>                                             | 104.524(7)                                                       |
| <b><math>\gamma</math> (deg)</b>                                            | 90                                                               |
| <b><i>V</i> (Å<sup>3</sup>)</b>                                             | 2537.1(3)                                                        |
| <b><i>Z</i></b>                                                             | 4                                                                |
| <b><i>T</i> (K)</b>                                                         | 298                                                              |
| <b><math>\rho_{\text{calcd}}</math> (g/cm<sup>3</sup>)</b>                  | 1.315                                                            |
| <b><i>R</i>[<i>I</i> &gt; 2.5<math>\sigma</math>(<i>I</i>)]</b>             | <i>R</i> 1 = 0.0339                                              |
| <b><i>R</i><sub>w</sub>[<i>I</i> &gt; 2.5<math>\sigma</math>(<i>I</i>)]</b> | <i>wR</i> 2 = 0.0869                                             |
| <b>Goodness of fit</b>                                                      | 1.073                                                            |

**Table S12.** Selected bond lengths for monoclinic form of Ni<sup>III</sup>L<sup>APIP-MeO</sup>

| Number | Atom1      | Atom2      | Length          |
|--------|------------|------------|-----------------|
| 1      | Ni1        | O1         | 1.843(2)        |
| 2      | Ni1        | N1         | 1.844(2)        |
| 3      | Ni1        | N2         | 1.852(2)        |
| 4      | Ni1        | N3         | 1.882(2)        |
| 5      | <b>O1</b>  | <b>C1</b>  | <b>1.331(4)</b> |
| 6      | C1         | C2         | 1.413(4)        |
| 7      | C1         | C6         | 1.408(4)        |
| 8      | C2         | C3         | 1.385(4)        |
| 9      | C2         | C20        | 1.537(5)        |
| 10     | C3         | H3A        | 0.93            |
| 11     | C3         | C4         | 1.409(4)        |
| 12     | C4         | C5         | 1.386(4)        |
| 13     | C4         | C24        | 1.538(4)        |
| 14     | C5         | H5A        | 0.93            |
| 15     | C5         | C6         | 1.396(4)        |
| 16     | <b>C6</b>  | <b>N1</b>  | <b>1.425(3)</b> |
| 17     | N1         | C7         | 1.308(4)        |
| 19     | C7         | C8         | 1.420(4)        |
| 20     | C8         | C9         | 1.417(4)        |
| 21     | C8         | C13        | 1.431(4)        |
| 23     | C9         | C10        | 1.360(4)        |
| 25     | C10        | C11        | 1.400(5)        |
| 27     | C11        | C12        | 1.376(5)        |
| 29     | C12        | C13        | 1.418(4)        |
| 30     | C13        | N2         | 1.367(4)        |
| 31     | <b>N2</b>  | <b>C14</b> | <b>1.448(4)</b> |
| 33     | C14        | C15        | 1.504(4)        |
| 34     | <b>C14</b> | <b>O2</b>  | <b>1.438(3)</b> |

**Table S13.** Crystallographic data for triclinic form of Ni<sup>II</sup>L<sup>APIP-MeO</sup>

| Identification code               | Ni <sup>II</sup> L <sup>APIP-MeO</sup> e712a                                                                                       |
|-----------------------------------|------------------------------------------------------------------------------------------------------------------------------------|
| Empirical formula                 | C <sub>28</sub> H <sub>33</sub> N <sub>3</sub> Ni O <sub>2</sub>                                                                   |
| Formula weight                    | 502.28                                                                                                                             |
| Temperature                       | 293(2) K                                                                                                                           |
| Wavelength                        | 0.71073 Å                                                                                                                          |
| Crystal system                    | Triclinic                                                                                                                          |
| Space group                       | P-1                                                                                                                                |
| Unit cell dimensions              | a = 9.3643(8) Å<br>b = 9.9780(8) Å<br>c = 14.3688(12) Å<br>$\alpha$ = 101.276(7)°<br>$\beta$ = 95.203(7)°<br>$\gamma$ = 99.728(7)° |
| Volume                            | 1287.04(19) Å <sup>3</sup>                                                                                                         |
| Z                                 | 2                                                                                                                                  |
| Density (calculated)              | 1.296 Mg/m <sup>3</sup>                                                                                                            |
| Absorption coefficient            | 0.783 mm <sup>-1</sup>                                                                                                             |
| F(000)                            | 532                                                                                                                                |
| Crystal size                      | 0.544 x 0.318 x 0.130 mm <sup>3</sup>                                                                                              |
| Theta range for data collection   | 2.225 to 28.096°                                                                                                                   |
| Index ranges                      | -6 ≤ h ≤ 12, -12 ≤ k ≤ 11, -17 ≤ l ≤ 18                                                                                            |
| Reflections collected             | 8310                                                                                                                               |
| Independent reflections           | 5514 [R(int) = 0.0542]                                                                                                             |
| Completeness to theta = 25.000°   | 99.9 %                                                                                                                             |
| Absorption correction             | Analytical                                                                                                                         |
| Max. and min. transmission        | 0.909 and 0.725                                                                                                                    |
| Refinement method                 | Full-matrix least-squares on F <sup>2</sup>                                                                                        |
| Data / restraints / parameters    | 5514 / 0 / 307                                                                                                                     |
| Goodness-of-fit on F <sup>2</sup> | 1.028                                                                                                                              |
| Final R indices [I > 2σ(I)]       | R1 = 0.0470, wR2 = 0.1246                                                                                                          |
| R indices (all data)              | R1 = 0.0671, wR2 = 0.1377                                                                                                          |
| Extinction coefficient            | n/a                                                                                                                                |
| Largest diff. peak and hole       | 0.408 and -0.517 e.Å <sup>-3</sup>                                                                                                 |

**Table S14.** Selected bond lengths for triclinic form of Ni<sup>III</sup>L<sup>APIP-MeO</sup>

| <b>Bond</b> |            | <b>Angle</b>       |                   |
|-------------|------------|--------------------|-------------------|
| Ni1-O1      | 1.8431(18) | O1-Ni1-N1          | <b>86.58(8)</b>   |
| Ni1-N1      | 1.844(2)   | O1-Ni1-N2          | <b>175.97(9)</b>  |
| Ni1-N2      | 1.853(2)   | N1-Ni1-N2          | <b>96.36(9)</b>   |
| Ni1-N3      | 1.881(2)   | O1-Ni1-N3          | <b>91.35(9)</b>   |
| O1-C1       | 1.330(3)   | N1-Ni1-N3          | <b>177.69(9)</b>  |
| C1-C6       | 1.408(3)   | N2-Ni1-N3          | <b>85.77(9)</b>   |
| C1-C2       | 1.413(3)   | C1-O1-Ni1          | <b>113.08(16)</b> |
| C2-C3       | 1.386(4)   | O1-C1-C6           | <b>116.8(2)</b>   |
| C2-C20      | 1.537(4)   | O1-C1-C2           | <b>124.2(2)</b>   |
| C3-C4       | 1.409(4)   | C6-C1-C2           | <b>119.0(2)</b>   |
| C4-C5       | 1.385(3)   | C3-C2-C1           | <b>116.9(2)</b>   |
| C4-C24      | 1.539(3)   | C3-C2-C20          | <b>122.7(2)</b>   |
| C5-C6       | 1.395(3)   | C1-C2-C20          | <b>120.4(2)</b>   |
| C6-N1       | 1.425(3)   | C2-C3-C4           | <b>124.7(2)</b>   |
| N1-C7       | 1.308(3)   | C5-C4-C3           | <b>117.4(2)</b>   |
| C7-C8       | 1.422(3)   | C5-C4-C24          | <b>123.3(2)</b>   |
| C8-C9       | 1.418(4)   | C3-C4-C24          | <b>119.3(2)</b>   |
| C8-C13      | 1.429(4)   | C4-C5-C6           | <b>119.7(2)</b>   |
| C9-C10      | 1.360(4)   | C5-C6-C1           | <b>122.1(2)</b>   |
| C10-C11     | 1.401(4)   | C5-C6-N1           | <b>126.7(2)</b>   |
| C10-H10A    | 0.9300     | C1-C6-N1           | <b>111.2(2)</b>   |
| C11-C12     | 1.376(4)   | C7-N1-C6           | <b>121.9(2)</b>   |
| C12-C13     | 1.418(3)   | C7-N1-Ni1          | <b>125.88(18)</b> |
| C13-N2      | 1.367(3)   | C6-N1-Ni1          | <b>112.19(16)</b> |
| N2-C14      | 1.448(3)   | N1-C7-C8           | <b>125.5(2)</b>   |
| C14-O2      | 1.437(3)   | C9-C8-C7           | <b>116.5(2)</b>   |
| C14-C15     | 1.505(4)   | C9-C8-C13          | <b>119.5(2)</b>   |
| C15-N3      | 1.346(3)   | C7-C8-C13          | <b>123.9(2)</b>   |
| C15-C16     | 1.381(4)   | C10-C9-C8          | <b>122.6(3)</b>   |
| C16-C17     | 1.378(5)   | C9-C10-C11         | <b>117.9(3)</b>   |
| C17-C18     | 1.389(5)   | C12-C11-C10        | <b>121.7(3)</b>   |
| C18-C19     | 1.366(4)   | C11-C12-C13        | <b>121.7(3)</b>   |
| C19-N3      | 1.349(4)   | N2-C13-C12         | <b>122.8(2)</b>   |
| C20-C23     | 1.520(5)   | N2-C13-C8          | <b>120.7(2)</b>   |
| C20-C21     | 1.530(4)   | C12-C13-C8         | <b>116.5(2)</b>   |
| C20-C22     | 1.534(5)   | C13-N2-C14         | <b>117.0(2)</b>   |
| C24-C27     | 1.521(4)   | C13-N2-Ni1         | <b>127.27(18)</b> |
| C24-C26     | 1.524(4)   | C14-N2-Ni1         | <b>115.36(18)</b> |
| C24-C25     | 1.529(4)   | O2-C14-N2          | <b>115.0(2)</b>   |
| O2-C28      | 1.405(4)   | O2-C14-C15         | <b>109.2(2)</b>   |
|             |            | N2-C14-C15         | <b>108.8(2)</b>   |
|             |            | N3-C15-C16         | <b>121.9(3)</b>   |
|             |            | N3-C15-C14         | <b>114.9(2)</b>   |
|             |            | C16-C15-C14        | <b>123.1(3)</b>   |
|             |            | C17-C16-C15        | <b>119.4(3)</b>   |
|             |            | C16-C17-C18        | <b>118.7(3)</b>   |
|             |            | C19-C18-C17        | <b>119.1(3)</b>   |
|             |            | N3-C19-C18         | <b>122.6(3)</b>   |
|             |            | C15-N3-C19         | <b>118.3(3)</b>   |
|             |            | C15-N3-Ni1         | <b>114.97(19)</b> |
|             |            | C19-N3-Ni1         | <b>126.8(2)</b>   |
|             |            | C23-C20-C21        | <b>107.9(3)</b>   |
|             |            | C23-C20-C22        | <b>109.4(3)</b>   |
|             |            | <b>C21-C20-C22</b> | <b>108.4(3)</b>   |
